# Supplementary material for: Predicting Causal Relationships from Biological Data: Applying Automated Causal Discovery on Mass Cytometry Data of Human Immune Cells
Source: PubMed Central journal article supplement (PMC5629212; doi:10.1038/s41598-017-08582-x), 2017-10-05
Supplement: 41598_2017_8582_MOESM1_ESM.pdf [file 41598_2017_8582_MOESM1_ESM.pdf]

# Supplementary Information: Predicting Causal Relationships from Biological Data: Applying Automated Causal Discovery on Mass Cytometry Data of Human Immune Cell

**Sofia Triantafyllou<sup>1,2,+,\*</sup>, Vincenzo Lagani<sup>1,+</sup>, Christina Heinze-Deml<sup>3</sup>, Angelika Schmidt<sup>4</sup>, Jesper Tegner<sup>4,5</sup>, and Ioannis Tsamardinos<sup>1</sup>**

<sup>1</sup>Department of Computer Science, University of Crete, Greece

<sup>2</sup>Department of Physical Medicine and Rehabilitation, Northwestern University, Chicago, IL

<sup>3</sup>Seminar for Statistics, ETH Zurich, Switzerland

<sup>4</sup>Unit of Computational Medicine, Center for Molecular Medicine, Department of Medicine Solna, Karolinska Institutet & Karolinska University Hospital, Science for Life Laboratory, Stockholm, Sweden

<sup>5</sup>Biological and Environmental Sciences and Engineering Division, Computer, Electrical and Mathematical Sciences and Engineering Division, King Abdullah University of Science and Technology (KAUST), Saudi Arabia

\*sofi.triantafyllou@northwestern.edu

+these authors contributed equally to this work

## Abstract

Learning the causal relationships that define a molecular system allows us to predict how the system will respond to different interventions. Distinguishing causality from mere association typically requires randomized experiments. Methods for automated causal discovery from limited experiments exist, but have so far rarely been tested in systems biology applications. In this work, we apply state-of-the-art causal discovery methods on a large collection of public mass cytometry data sets, measuring intra-cellular signaling proteins of the human immune system and their response to several perturbations. We show how different experimental conditions can be used to facilitate causal discovery, and apply two fundamental methods that produce context-specific causal predictions. Causal predictions were reproducible across independent data sets from two different studies, but often disagree with the KEGG pathway databases. Within this context, we discuss the caveats we need to overcome for automated causal discovery to become a part of the routine data analysis in systems biology.

**Supplementary Information** This document provides supplementary information for the article *Predicting Causal Relationships from Biological Data: Applying Automated Causal Discovery on Mass Cytometry Data of Human Immune Cell*.

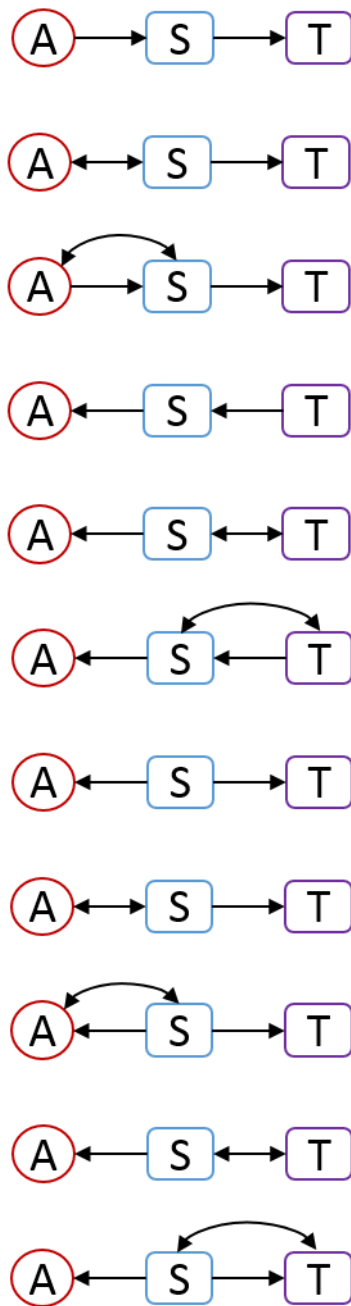

Figure 1. All possible networks for three variables  $A, S, T$  that entail  $A \perp T | S$  allowing for confounding and no background knowledge. A bi-directed edge denotes the presence of at least one confounder that causes both endpoints.

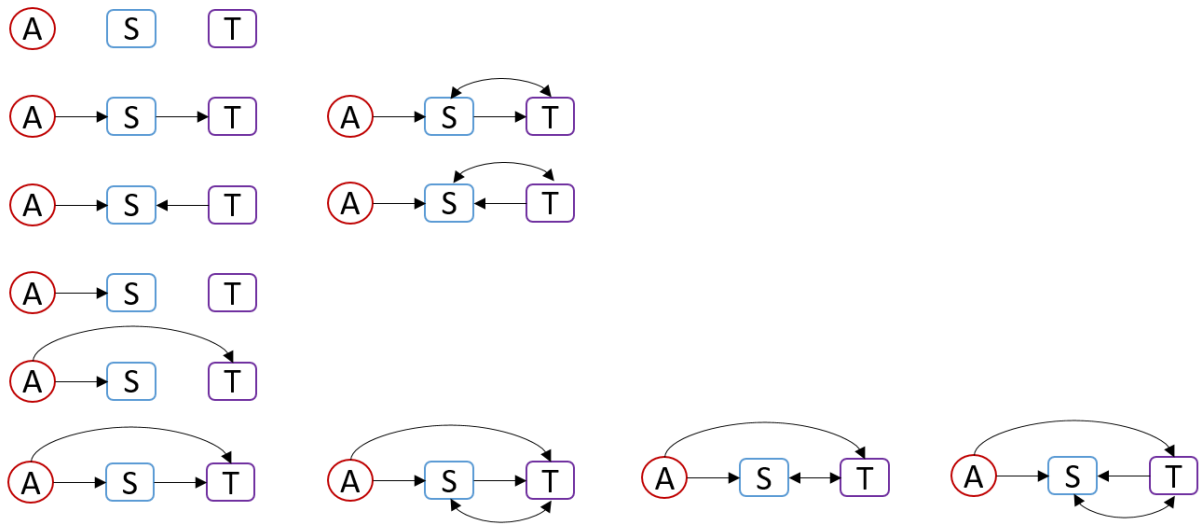

Figure 2. All possible networks for three variables A, S, T where A is known uncaused entity, in the presence of latent confounders. A bi-directed edge denotes the presence of at least one confounder that causes both endpoints.

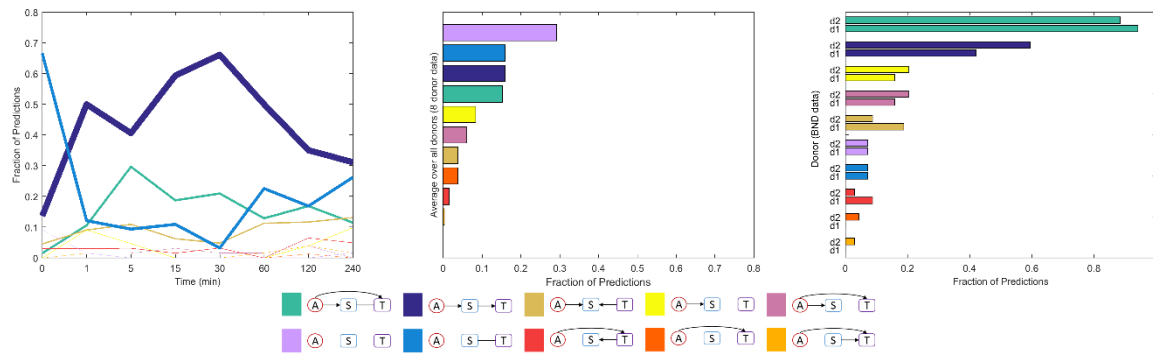

Figure 3. Distribution of highest-scoring networks for CLCD predictions in independent data sets. (left) Different time-points, (middle) different donors, (right) a matching population in bone marrow data from<sup>1</sup>.

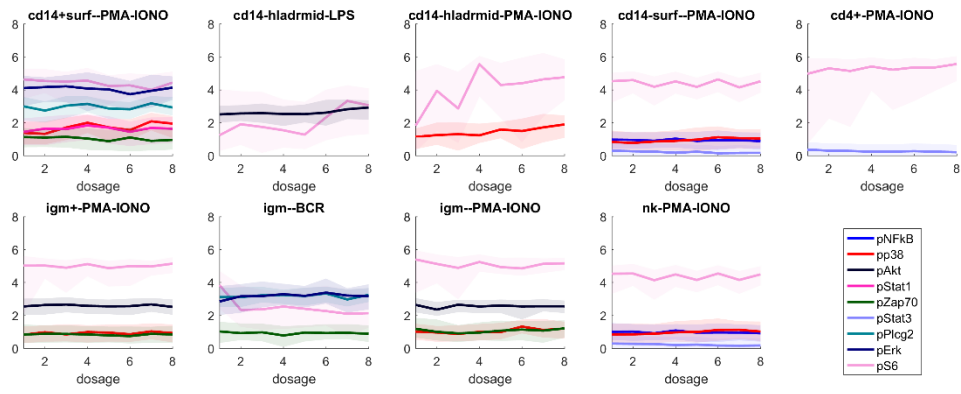

Figure 4. Response of pS6 and its CLCD predicted targets for different Rapamycin dosages

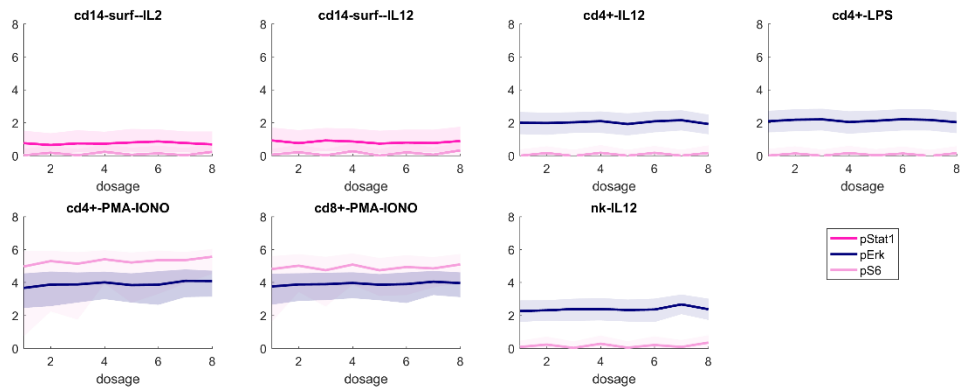

Figure 5. Response of pS6 and its BACKSHIFT predicted targets for different Rapamycin dosages

#### Supplementary Discussion 1: CLCD hyper-parameters sensibility analysis.

The operation of the Conservative Local Causal Discovery (CLCD) presented in the main paper depends upon three hyper-parameters: the dependence threshold  $\alpha$ , the independence threshold  $\beta$  and the number  $N$  of replicated datasets where the triplet is confirmed. We perform a sensitivity analysis for these hyper-parameters, assessing whether and how their change would affect our results and conclusion.

We repeated the CLCD analysis by varying  $\alpha$  in  $[0.05, 0.01, 0.005, 0.001]$ ,  $\beta$  in  $[0.1, 0.15, 0.2, 0.25]$  and setting  $N$  to each integer number between 5 and 15.

Supplementary Figures 6 and 7 report the average number of triplets for each value of  $N$  and for  $\beta$  set to 0.15 or  $\alpha$  set to 0.001, respectively. Both figures shows the same trend: the number of triplets rapidly decreases as the number of replicated datasets increases. The vertical bars show the variations due to changes in  $\alpha$  and in  $\beta$ , respectively. Notably, the number of triplets is influenced more heavily by the number  $N$  of replicated datasets than by  $\alpha$  and  $\beta$ .

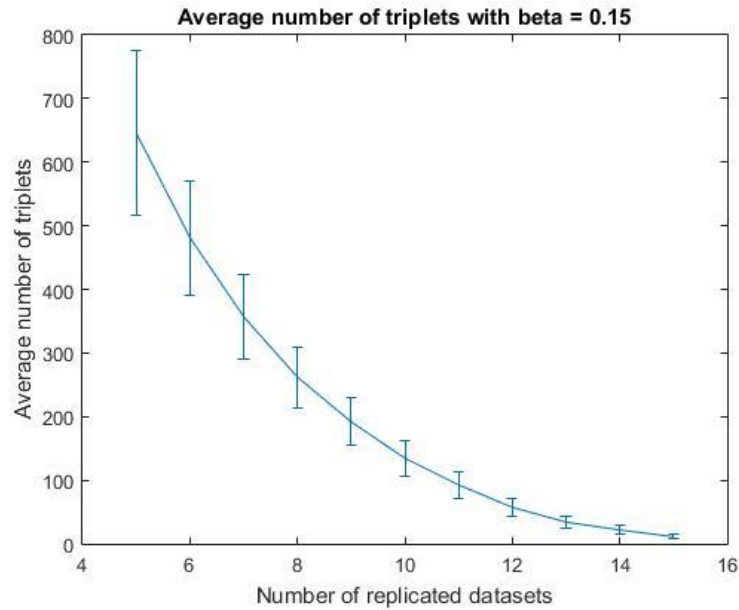

Figure 6. Number of triplets for different number of replicated datasets (x-axis) and beta hyper-parameter set to 0.15. Each point reports the average number of triplets across alpha values, while the vertical bars indicate the respective standard variation.

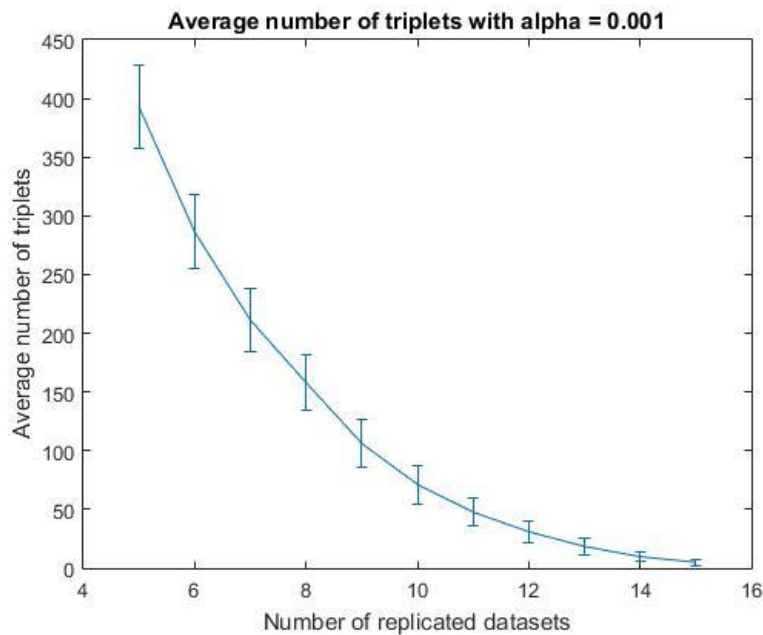

Figure 7: Number of triplets for different number of replicated datasets (x-axis) and alpha hyper-parameter set to 0.001. Each point reports the average number of triplets across beta values, while the vertical bars indicate the respective standard variation.

We then proceed to validate the triplets found for  $N$  in [5, 7, 10, 12] against the KEGG databases with the same procedure described in the main text, setting  $\alpha$  and  $\beta$  to the same values used in the main paper (0.001 and 0.15, respectively). The results are reported in Supplementary Figure 8 to Figure 11:

it is possible to observe that changing the number of replicated datasets does not remarkably alter the trends in the validation results, neither the final conclusions.

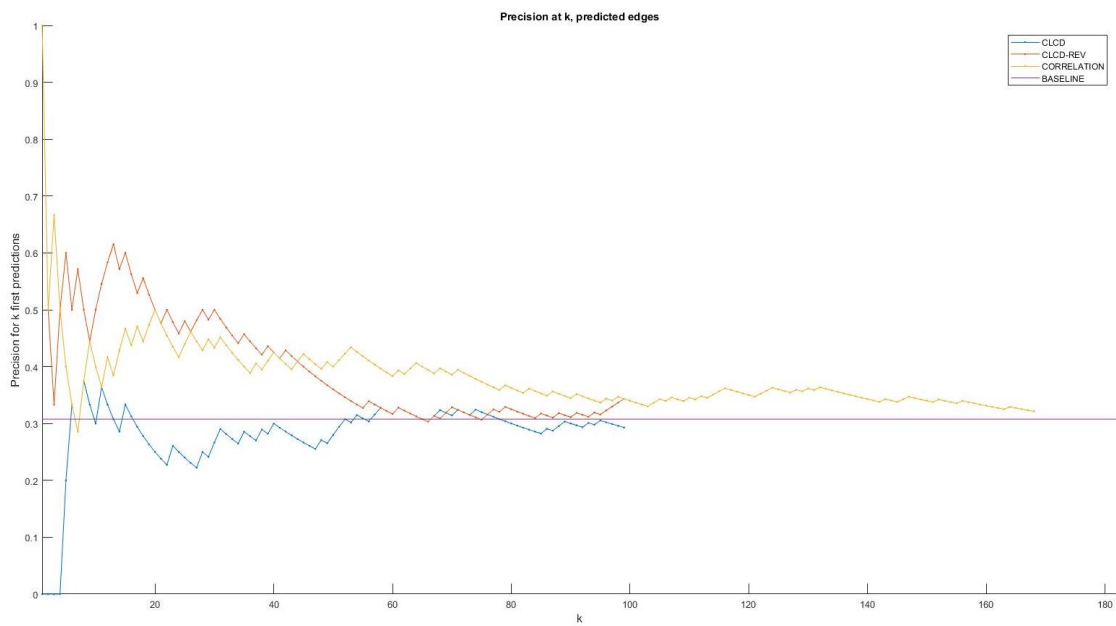

Figure 8: Precision of CLCD predictions in KEGG human pathways for number of replicated datasets set to 5. Details as in Fig.6 of the main text.



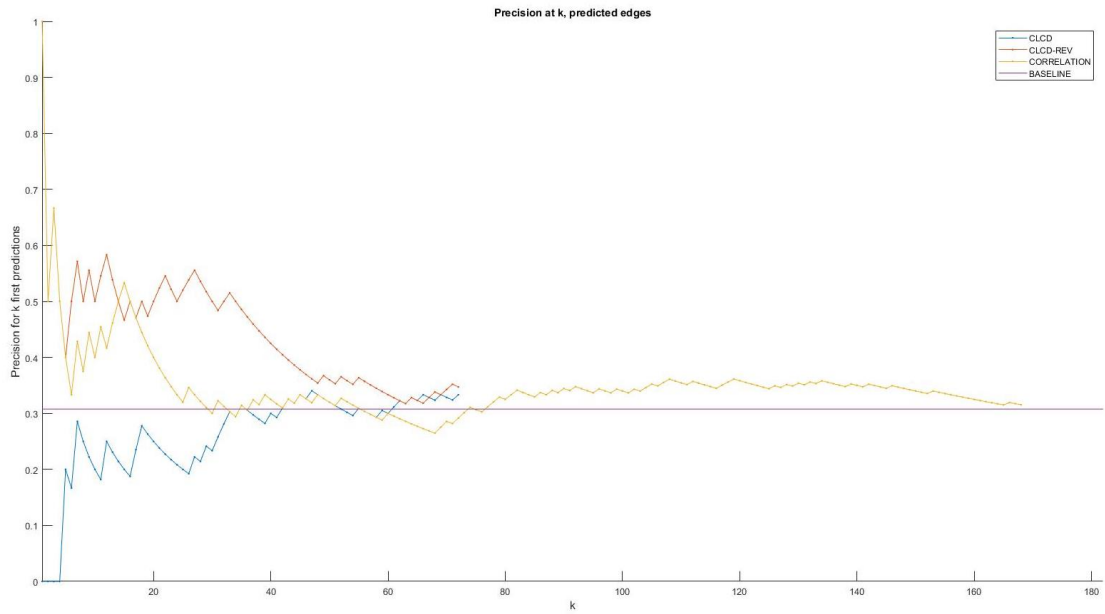

Figure 9: Precision of CLCD predictions in KEGG human pathways for number of replicated datasets set to 7. Details as in Fig.6 of the main text.

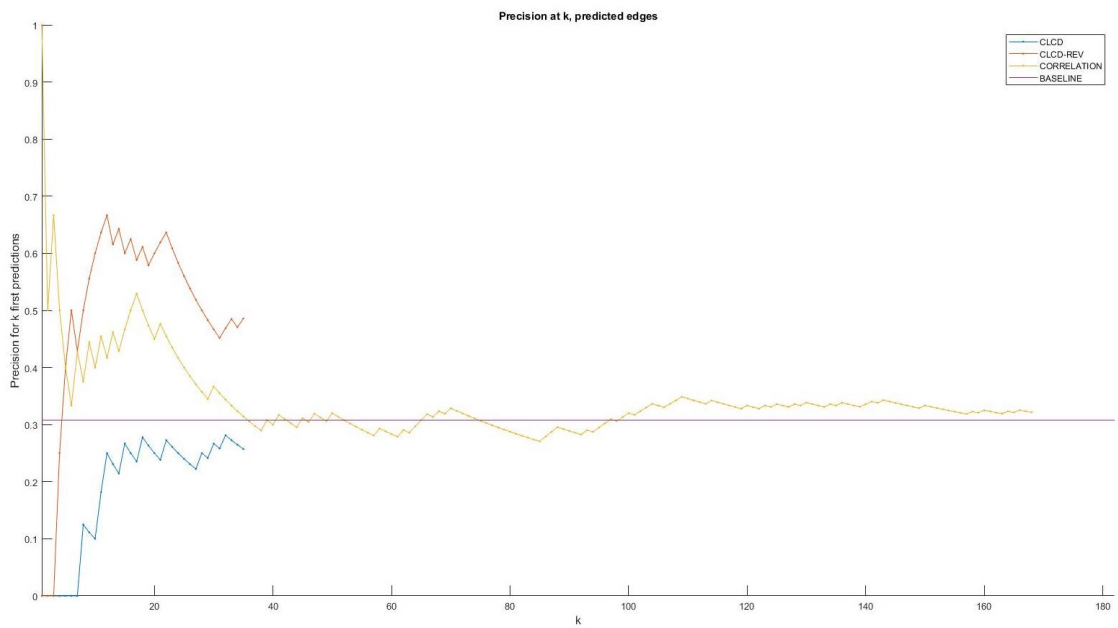

Figure 10: Precision of CLCD predictions in KEGG human pathways for number of replicated datasets set to 10 (as in the main analysis). Details as in Fig.6 of the main text.

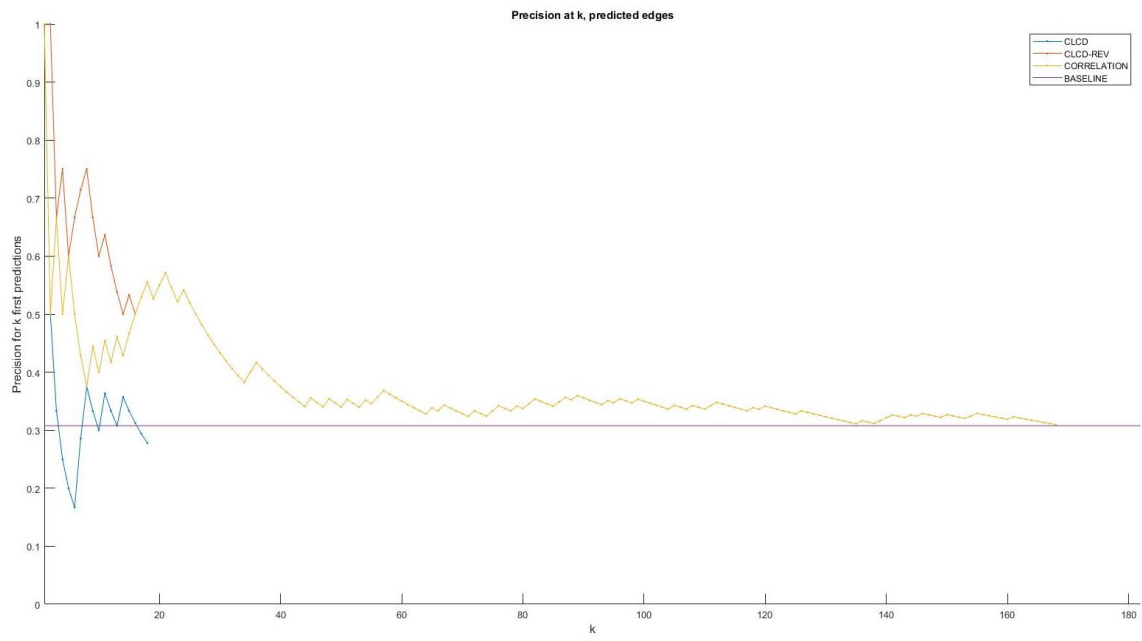

Figure 11: Precision of CLCD predictions in KEGG human pathways for number of replicated datasets set to 12. Details as in Fig.6 of the main text.

Table 1. Proteins and activators measured in<sup>1</sup>and<sup>2</sup>.

| Functional proteins       |                       | Activators                |                       |
|---------------------------|-----------------------|---------------------------|-----------------------|
| Bodenmiller et al. (2012) | Bendall et al. (2011) | Bodenmiller et al. (2012) | Bendall et al. (2011) |
| pNkfb                     | pNkfb                 | BCR                       | BCR                   |
| pp38                      | pp38                  | GCSF                      | GCSF                  |
| pStat5                    | pStat5                | IFNa                      | IFNa                  |
| pAkt                      |                       | LPS                       | LPS                   |
| pStat1                    |                       | PMA-Iono                  | PMA-Iono              |
| pSHP2                     | pSHP2                 | PVO4                      | PVO4                  |
| pZap70/pSyk               | pZap70/pSyk           | IFN-g                     |                       |
| pSlp76/BLNK               | pSlp76/BLNK           | IL-2                      |                       |
| pBtk                      | pBtk                  | IL-3                      | IL-3                  |
| pPlcg2                    | pPlcg2                | IL-12                     |                       |
| pStat3                    | pStat3                | GMCSF                     | GMCSF                 |
| pErk                      | pErk                  |                           | IL-7                  |
| pLat                      |                       |                           | SCF                   |
| pS6                       | pS6                   |                           | TNF $\alpha$          |
|                           | Ki67                  |                           | TPO                   |
|                           | pCrkL                 |                           | FIt3L                 |
|                           | pMAPKAPK2             |                           |                       |
|                           | IkB $\alpha$          |                           |                       |
|                           | pH3                   |                           |                       |
|                           | pSrcFK                |                           |                       |
|                           | pCREB                 |                           |                       |

Table 2. Gated subpopulations in<sup>1</sup>and<sup>2</sup>.

| Population             | Subpopulations in Bodenmiller et al. (2012)                                                                                                             | Subpopulations in Bendall et al. (2011)                                                          |
|------------------------|---------------------------------------------------------------------------------------------------------------------------------------------------------|--------------------------------------------------------------------------------------------------|
| <b>Monocytes</b>       | CD14+HLA-DR-,<br>CD14+HLA-DR <sup>high</sup><br>CD14+HLA-DR <sup>mid</sup><br>CD14-HLA-DR-<br>CD14-HLA-DR <sup>high</sup><br>CD14-HLA-DR <sup>mid</sup> | CD11b- Monocyte<br>CD11b <sup>mid</sup> Monocyte<br>CD11b <sup>hi</sup> Monocyte                 |
| <b>T-cells</b>         | CD4+                                                                                                                                                    | Mature CD4+ T<br>Naive CD4+ T                                                                    |
|                        | CD8+                                                                                                                                                    | Naive CD8+ T<br>Mature CD8+ T                                                                    |
| <b>NK</b>              | NK                                                                                                                                                      | NK                                                                                               |
| <b>B-cells</b>         | Igm+<br>Igm-                                                                                                                                            | Pre-B II<br>Mature CD38 <sup>lo</sup> B<br>Pre-B I<br>Mature CD38 <sup>mid</sup> B<br>Immature B |
| <b>Dendritic cells</b> | Dendritic                                                                                                                                               | Plasmacytoid DC                                                                                  |

Table 3. CLCD and BACKSHIFT predictions.

| Algorithm | Population     | Activator | Source | Target |
|-----------|----------------|-----------|--------|--------|
| CLCD      | CD14+HLA-DR-   | pVO4      | pSlp76 | pStat3 |
| CLCD      | CD14+HLA-DR-   | pVO4      | pPlcg2 | pStat3 |
| CLCD      | CD14+HLA-DRmid | pVO4      | pSHP2  | pZap70 |
| CLCD      | CD14+HLA-DRmid | pVO4      | pSlp76 | pZap70 |
| CLCD      | CD14+HLA-DRmid | LPS       | pp38   | pBtk   |
| CLCD      | CD14+surf      | pVO4      | pStat5 | pStat3 |
| CLCD      | CD14+surf      | pVO4      | pStat5 | pBtk   |
| CLCD      | CD14+surf      | pVO4      | pSHP2  | pStat3 |
| CLCD      | CD14+surf      | pVO4      | pSlp76 | pp38   |
| CLCD      | CD14+surf      | pVO4      | pSlp76 | pStat3 |
| CLCD      | CD14+surf      | pVO4      | pSlp76 | pBtk   |
| CLCD      | CD14+surf      | pVO4      | pPlcg2 | pZap70 |
| CLCD      | CD14+surf      | pVO4      | pPlcg2 | pStat3 |
| CLCD      | CD14+surf      | pVO4      | pPlcg2 | pBtk   |
| CLCD      | CD14+surf      | PMA-IONO  | pp38   | pPlcg2 |
| CLCD      | CD14+surf      | PMA-IONO  | pErk   | pZap70 |
| CLCD      | CD14+surf      | PMA-IONO  | pS6    | pp38   |
| CLCD      | CD14+surf      | PMA-IONO  | pS6    | pStat1 |
| CLCD      | CD14+surf      | PMA-IONO  | pS6    | pZap70 |
| CLCD      | CD14+surf      | PMA-IONO  | pS6    | pPlcg2 |
| CLCD      | CD14+surf      | PMA-IONO  | pS6    | pErk   |
| CLCD      | CD14-HLA-DR-   | pVO4      | pPlcg2 | pZap70 |
| CLCD      | CD14-HLA-DR-   | pVO4      | pPlcg2 | pStat3 |
| CLCD      | CD14-HLA-DRmid | pVO4      | pSlp76 | pSHP2  |
| CLCD      | CD14-HLA-DRmid | pVO4      | pSlp76 | pZap70 |
| CLCD      | CD14-HLA-DRmid | pVO4      | pPlcg2 | pZap70 |
| CLCD      | CD14-HLA-DRmid | LPS       | pp38   | pAkt   |
| CLCD      | CD14-HLA-DRmid | LPS       | pErk   | pAkt   |
| CLCD      | CD14-HLA-DRmid | LPS       | pS6    | pAkt   |
| CLCD      | CD14-HLA-DRmid | PMA-IONO  | pS6    | pp38   |
| CLCD      | CD14-surf-     | pVO4      | pSHP2  | pStat3 |
| CLCD      | CD14-surf-     | pVO4      | pSlp76 | pStat3 |
| CLCD      | CD14-surf-     | pVO4      | pPlcg2 | pStat3 |
| CLCD      | CD14-surf-     | LPS       | pErk   | pPlcg2 |
| CLCD      | CD14-surf-     | PMA-IONO  | pp38   | pStat3 |
| CLCD      | CD14-surf-     | PMA-IONO  | pErk   | pZap70 |
| CLCD      | CD14-surf-     | PMA-IONO  | pErk   | pStat3 |
| CLCD      | CD14-surf-     | PMA-IONO  | pS6    | pNFkB  |
| CLCD      | CD14-surf-     | PMA-IONO  | pS6    | pp38   |
| CLCD      | CD14-surf-     | PMA-IONO  | pS6    | pStat3 |
| CLCD      | CD4+           | IL12      | pSlp76 | pp38   |
| CLCD      | CD4+           | IL12      | pSlp76 | pZap70 |
| CLCD      | CD4+           | GMCSF     | pSlp76 | pStat3 |
| CLCD      | CD4+           | LPS       | pSlp76 | pStat3 |
| CLCD      | CD4+           | PMA-IONO  | pS6    | pStat3 |
| CLCD      | CD8+           | pVO4      | pStat5 | pStat3 |
| CLCD      | CD8+           | pVO4      | pSHP2  | pStat3 |

|           |            |          |        |        |
|-----------|------------|----------|--------|--------|
| CLCD      | CD8+       | pVO4     | pSlp76 | pZap70 |
| CLCD      | CD8+       | pVO4     | pPlcg2 | pZap70 |
| CLCD      | CD8+       | pVO4     | pPlcg2 | pStat3 |
| CLCD      | CD8+       | PMA-IONO | pp38   | pStat3 |
| CLCD      | CD8+       | PMA-IONO | pErk   | pStat3 |
| CLCD      | Igm+       | pVO4     | pZap70 | pp38   |
| CLCD      | Igm+       | pVO4     | pPlcg2 | pSHP2  |
| CLCD      | Igm+       | pVO4     | pPlcg2 | pSlp76 |
| CLCD      | Igm+       | BCR      | pZap70 | pAkt   |
| CLCD      | Igm+       | BCR      | pSlp76 | pAkt   |
| CLCD      | Igm+       | BCR      | pErk   | pAkt   |
| CLCD      | Igm+       | PMA-IONO | pAkt   | pStat1 |
| CLCD      | Igm+       | PMA-IONO | pS6    | pp38   |
| CLCD      | Igm+       | PMA-IONO | pS6    | pAkt   |
| CLCD      | Igm+       | PMA-IONO | pS6    | pZap70 |
| CLCD      | Igm-       | pVO4     | pZap70 | pBtk   |
| CLCD      | Igm-       | pVO4     | pSlp76 | pSHP2  |
| CLCD      | Igm-       | pVO4     | pPlcg2 | pSHP2  |
| CLCD      | Igm-       | pVO4     | pPlcg2 | pSlp76 |
| CLCD      | Igm-       | BCR      | pPlcg2 | pSlp76 |
| CLCD      | Igm-       | BCR      | pS6    | pZap70 |
| CLCD      | Igm-       | BCR      | pS6    | pPlcg2 |
| CLCD      | Igm-       | BCR      | pS6    | pErk   |
| CLCD      | Igm-       | PMA-IONO | pS6    | pp38   |
| CLCD      | Igm-       | PMA-IONO | pS6    | pAkt   |
| CLCD      | Igm-       | PMA-IONO | pS6    | pZap70 |
| CLCD      | NK         | pVO4     | pStat5 | pStat3 |
| CLCD      | NK         | pVO4     | pSHP2  | pStat3 |
| CLCD      | NK         | pVO4     | pSlp76 | pStat3 |
| CLCD      | NK         | PMA-IONO | pErk   | pStat1 |
| CLCD      | NK         | PMA-IONO | pErk   | pZap70 |
| CLCD      | NK         | PMA-IONO | pErk   | pStat3 |
| CLCD      | NK         | PMA-IONO | pS6    | pNFkB  |
| CLCD      | NK         | PMA-IONO | pS6    | pp38   |
| CLCD      | NK         | PMA-IONO | pS6    | pStat3 |
| BACKSHIFT | CD14-surf- | IL12     | pp38   | pNFkB  |
| BACKSHIFT | CD14-surf- | Ref      | pp38   | pNFkB  |
| BACKSHIFT | CD14-surf- | BCR      | pStat3 | pNFkB  |
| BACKSHIFT | CD14-surf- | GCSF     | pStat3 | pNFkB  |
| BACKSHIFT | CD14-surf- | GMCSF    | pStat3 | pNFkB  |
| BACKSHIFT | CD14-surf- | IL12     | pStat3 | pNFkB  |
| BACKSHIFT | CD14-surf- | IL2      | pStat3 | pNFkB  |
| BACKSHIFT | CD14-surf- | LPS      | pStat3 | pNFkB  |
| BACKSHIFT | CD14-surf- | Ref      | pStat3 | pNFkB  |
| BACKSHIFT | CD14-surf- | LPS      | pNFkB  | pp38   |
| BACKSHIFT | CD14-surf- | IFNg     | pp38   | pStat5 |
| BACKSHIFT | CD14-surf- | IFNg     | pZap70 | pAkt   |
| BACKSHIFT | CD14-surf- | IL12     | pZap70 | pAkt   |
| BACKSHIFT | CD14-surf- | IL12     | pNFkB  | pStat1 |
| BACKSHIFT | CD14-surf- | IL2      | pNFkB  | pStat1 |

|           |            |          |        |        |
|-----------|------------|----------|--------|--------|
| BACKSHIFT | CD14-surf- | LPS      | pp38   | pStat1 |
| BACKSHIFT | CD14-surf- | IL2      | pStat5 | pStat1 |
| BACKSHIFT | CD14-surf- | IFNg     | pAkt   | pStat1 |
| BACKSHIFT | CD14-surf- | Ref      | pAkt   | pStat1 |
| BACKSHIFT | CD14-surf- | IL2      | pStat3 | pStat1 |
| BACKSHIFT | CD14-surf- | IL12     | pS6    | pStat1 |
| BACKSHIFT | CD14-surf- | IL2      | pS6    | pStat1 |
| BACKSHIFT | CD14-surf- | IL12     | pAkt   | pZap70 |
| BACKSHIFT | CD14-surf- | IFNg     | pp38   | pStat3 |
| BACKSHIFT | CD14-surf- | IFNg     | pp38   | pSlp76 |
| BACKSHIFT | CD14-surf- | IL2      | pBtk   | pSlp76 |
| BACKSHIFT | CD14-surf- | IFNg     | pPlcg2 | pSlp76 |
| BACKSHIFT | CD14-surf- | LPS      | pSlp76 | pBtk   |
| BACKSHIFT | CD14-surf- | BCR      | pAkt   | pPlcg2 |
| BACKSHIFT | CD14-surf- | GCSF     | pAkt   | pPlcg2 |
| BACKSHIFT | CD14-surf- | LPS      | pAkt   | pPlcg2 |
| BACKSHIFT | CD14-surf- | LPS      | pStat1 | pPlcg2 |
| BACKSHIFT | CD14-surf- | IL12     | pZap70 | pPlcg2 |
| BACKSHIFT | CD14-surf- | IL2      | pZap70 | pPlcg2 |
| BACKSHIFT | CD14-surf- | LPS      | pZap70 | pPlcg2 |
| BACKSHIFT | CD14-surf- | IL12     | pSlp76 | pPlcg2 |
| BACKSHIFT | CD14-surf- | LPS      | pSlp76 | pPlcg2 |
| BACKSHIFT | CD14-surf- | pVO4     | pSlp76 | pPlcg2 |
| BACKSHIFT | CD14-surf- | pVO4     | pSlp76 | pPlcg2 |
| BACKSHIFT | CD14-surf- | IL2      | pBtk   | pPlcg2 |
| BACKSHIFT | CD14-surf- | LPS      | pErk   | pPlcg2 |
| BACKSHIFT | CD14-surf- | IFNg     | pp38   | pErk   |
| BACKSHIFT | CD14-surf- | LPS      | pSlp76 | pErk   |
| BACKSHIFT | CD14-surf- | IFNa     | pPlcg2 | pErk   |
| BACKSHIFT | CD14-surf- | IFNa     | pPlcg2 | pErk   |
| BACKSHIFT | CD14-surf- | IFNa     | pPlcg2 | pErk   |
| BACKSHIFT | CD14-surf- | PMA-IONO | pp38   | pS6    |
| BACKSHIFT | CD14-surf- | PMA-IONO | pAkt   | pS6    |
| BACKSHIFT | CD14-surf- | PMA-IONO | pErk   | pS6    |
| BACKSHIFT | CD4+       | IL2      | pp38   | pNFkB  |
| BACKSHIFT | CD4+       | LPS      | pp38   | pNFkB  |
| BACKSHIFT | CD4+       | GCSF     | pStat3 | pNFkB  |
| BACKSHIFT | CD4+       | IFNa     | pStat3 | pNFkB  |
| BACKSHIFT | CD4+       | IFNg     | pStat3 | pNFkB  |
| BACKSHIFT | CD4+       | IL12     | pStat3 | pNFkB  |
| BACKSHIFT | CD4+       | IL2      | pStat3 | pNFkB  |
| BACKSHIFT | CD4+       | IL3      | pStat3 | pNFkB  |
| BACKSHIFT | CD4+       | LPS      | pStat3 | pNFkB  |
| BACKSHIFT | CD4+       | PMA-IONO | pStat3 | pNFkB  |
| BACKSHIFT | CD4+       | GCSF     | pNFkB  | pp38   |
| BACKSHIFT | CD4+       | IL2      | pNFkB  | pp38   |
| BACKSHIFT | CD4+       | IFNa     | pStat3 | pStat5 |
| BACKSHIFT | CD4+       | IFNa     | pStat3 | pStat5 |
| BACKSHIFT | CD4+       | IL2      | pStat5 | pStat1 |
| BACKSHIFT | CD4+       | GCSF     | pAkt   | pStat1 |





|           |      |          |        |        |
|-----------|------|----------|--------|--------|
| BACKSHIFT | CD4+ | PMA-IONO | pErk   | pS6    |
| BACKSHIFT | CD4+ | PMA-IONO | pErk   | pS6    |
| BACKSHIFT | CD4+ | PMA-IONO | pErk   | pS6    |
| BACKSHIFT | CD4+ | BCR      | pLat   | pS6    |
| BACKSHIFT | CD4+ | PMA-IONO | pLat   | pS6    |
| BACKSHIFT | CD8+ | BCR      | pStat3 | pNFkB  |
| BACKSHIFT | CD8+ | GCSF     | pStat3 | pNFkB  |
| BACKSHIFT | CD8+ | GMCSF    | pStat3 | pNFkB  |
| BACKSHIFT | CD8+ | IFNa     | pStat3 | pNFkB  |
| BACKSHIFT | CD8+ | IL12     | pStat3 | pNFkB  |
| BACKSHIFT | CD8+ | IL2      | pStat3 | pNFkB  |
| BACKSHIFT | CD8+ | IL3      | pStat3 | pNFkB  |
| BACKSHIFT | CD8+ | LPS      | pStat3 | pNFkB  |
| BACKSHIFT | CD8+ | PMA-IONO | pStat3 | pNFkB  |
| BACKSHIFT | CD8+ | Ref      | pStat3 | pNFkB  |
| BACKSHIFT | CD8+ | IFNa     | pStat5 | pStat1 |
| BACKSHIFT | CD8+ | BCR      | pStat5 | pStat3 |
| BACKSHIFT | CD8+ | IFNa     | pp38   | pSlp76 |
| BACKSHIFT | CD8+ | IL3      | pBtk   | pSlp76 |
| BACKSHIFT | CD8+ | IFNa     | pPlcg2 | pSlp76 |
| BACKSHIFT | CD8+ | IL3      | pStat5 | pPlcg2 |
| BACKSHIFT | CD8+ | LPS      | pAkt   | pPlcg2 |
| BACKSHIFT | CD8+ | GMCSF    | pSlp76 | pPlcg2 |
| BACKSHIFT | CD8+ | pVO4     | pSlp76 | pPlcg2 |
| BACKSHIFT | CD8+ | pVO4     | pSlp76 | pPlcg2 |
| BACKSHIFT | CD8+ | GMCSF    | pBtk   | pPlcg2 |
| BACKSHIFT | CD8+ | IL2      | pBtk   | pErk   |
| BACKSHIFT | CD8+ | pVO4     | pBtk   | pErk   |
| BACKSHIFT | CD8+ | IFNg     | pPlcg2 | pErk   |
| BACKSHIFT | CD8+ | IL3      | pPlcg2 | pErk   |
| BACKSHIFT | CD8+ | PMA-IONO | pS6    | pErk   |
| BACKSHIFT | CD8+ | PMA-IONO | pS6    | pErk   |
| BACKSHIFT | CD8+ | GMCSF    | pErk   | pLat   |
| BACKSHIFT | CD8+ | IFNg     | pErk   | pLat   |
| BACKSHIFT | CD8+ | LPS      | pErk   | pLat   |
| BACKSHIFT | CD8+ | LPS      | pp38   | pS6    |
| BACKSHIFT | CD8+ | PMA-IONO | pp38   | pS6    |
| BACKSHIFT | CD8+ | PMA-IONO | pp38   | pS6    |
| BACKSHIFT | CD8+ | PMA-IONO | pAkt   | pS6    |
| BACKSHIFT | CD8+ | PMA-IONO | pZap70 | pS6    |
| BACKSHIFT | CD8+ | GMCSF    | pPlcg2 | pS6    |
| BACKSHIFT | CD8+ | PMA-IONO | pPlcg2 | pS6    |
| BACKSHIFT | CD8+ | PMA-IONO | pErk   | pS6    |
| BACKSHIFT | CD8+ | PMA-IONO | pErk   | pS6    |
| BACKSHIFT | CD8+ | PMA-IONO | pErk   | pS6    |
| BACKSHIFT | CD8+ | PMA-IONO | pErk   | pS6    |
| BACKSHIFT | CD8+ | PMA-IONO | pErk   | pS6    |
| BACKSHIFT | CD8+ | PMA-IONO | pErk   | pS6    |
| BACKSHIFT | CD8+ | PMA-IONO | pErk   | pS6    |
| BACKSHIFT | CD8+ | PMA-IONO | pErk   | pS6    |
| BACKSHIFT | CD8+ | PMA-IONO | pLat   | pS6    |
| BACKSHIFT | NK   | BCR      | pStat3 | pNFkB  |

|           |    |          |        |        |
|-----------|----|----------|--------|--------|
| BACKSHIFT | NK | GMCSF    | pStat3 | pNFkB  |
| BACKSHIFT | NK | IL2      | pStat3 | pNFkB  |
| BACKSHIFT | NK | IFNg     | pStat5 | pp38   |
| BACKSHIFT | NK | IFNg     | pp38   | pStat5 |
| BACKSHIFT | NK | IFNg     | pp38   | pStat3 |
| BACKSHIFT | NK | IL3      | pBtk   | pSlp76 |
| BACKSHIFT | NK | IFNg     | pPlcg2 | pSlp76 |
| BACKSHIFT | NK | IFNg     | pp38   | pBtk   |
| BACKSHIFT | NK | BCR      | pAkt   | pPlcg2 |
| BACKSHIFT | NK | GMCSF    | pAkt   | pPlcg2 |
| BACKSHIFT | NK | IFNg     | pAkt   | pPlcg2 |
| BACKSHIFT | NK | IL3      | pAkt   | pPlcg2 |
| BACKSHIFT | NK | LPS      | pAkt   | pPlcg2 |
| BACKSHIFT | NK | Ref      | pAkt   | pPlcg2 |
| BACKSHIFT | NK | GMCSF    | pZap70 | pPlcg2 |
| BACKSHIFT | NK | IL12     | pZap70 | pPlcg2 |
| BACKSHIFT | NK | GMCSF    | pSlp76 | pPlcg2 |
| BACKSHIFT | NK | GMCSF    | pSlp76 | pPlcg2 |
| BACKSHIFT | NK | pVO4     | pSlp76 | pPlcg2 |
| BACKSHIFT | NK | pVO4     | pSlp76 | pPlcg2 |
| BACKSHIFT | NK | GMCSF    | pErk   | pPlcg2 |
| BACKSHIFT | NK | IL3      | pErk   | pPlcg2 |
| BACKSHIFT | NK | Ref      | pAkt   | pErk   |
| BACKSHIFT | NK | IFNa     | pPlcg2 | pErk   |
| BACKSHIFT | NK | IL3      | pPlcg2 | pErk   |
| BACKSHIFT | NK | IL12     | pS6    | pErk   |
| BACKSHIFT | NK | PMA-IONO | pp38   | pS6    |
| BACKSHIFT | NK | PMA-IONO | pPlcg2 | pS6    |

## References

1. Bendall, S. C. et al. Single-Cell Mass Cytometry of Differential Immune and Drug Responses Across a Human Hematopoietic Continuum. *Science* 332, 687–696 (2011).
2. Bodenmiller, B. et al. Multiplexed mass cytometry profiling of cellular states perturbed by small-molecule regulators. *Nature biotechnology* 30, 858–867 (2012).
